# Supplementary material
Source: MDPI journal article supplement (https://www.mdpi.com/1424-2818/9/4/53)
Supplement: s1 [file s1]

1 Article

# 2 Taxonomic and Metabolite Diversity of Actinomycetes Associated with Three 3 Australian Ascidians

4 Larissa Buedenbender <sup>1,\*</sup>, Anthony R. Carroll <sup>1</sup>, Merrick Ekins <sup>2</sup> and D. Ipek Kurtböke <sup>3,\*</sup>

5 <sup>1</sup> Environmental Futures Research Institute, School of Environment, Griffith University, Gold Coast Campus, Southport QLD 4222, Australia; a.carroll@griffith.edu.au

6 <sup>2</sup> Natural Environments Program, Queensland Museum, P.O. Box 3300, South Brisbane, QLD 4101, Australia; merrick.ekins@qm.qld.gov.au

7 <sup>3</sup> GeneCology Research Centre, Faculty of Science, Health, Education and Engineering, University of the Sunshine Coast, Maroochydore, QLD 4558, Australia

8 \* Correspondence: larissa.buedenbender@griffithuni.edu.au (L.B.); IKurtbok@usc.edu.au (D.I.K.);

9 Tel.: +61-(07)-5430-2819 (D.I.K.)

10

Table S1 – Ascidian-associated actinomycete collection

| Isolate-ID | OTU      | Ascidian host   | Isolation media | 16S rRNA identification | GenBank accession # |
|------------|----------|-----------------|-----------------|-------------------------|---------------------|
| USC16000   | denovo32 | <i>S. rubra</i> | SCA             | <i>Streptomyces</i> sp. | MF773756            |
| USC16001   | denovo11 | <i>S. rubra</i> | CS              | <i>Streptomyces</i> sp. | MF773757            |
| USC16002   | denovo69 | <i>S. rubra</i> | CS              | <i>Streptomyces</i> sp. | MF773758            |
| USC16003   | denovo19 | <i>S. rubra</i> | CS              | <i>Streptomyces</i> sp. | MF773759            |
| USC16004   | denovo49 | <i>S. rubra</i> | CS              | <i>Streptomyces</i> sp. | MF773760            |
| USC16005   | denovo43 | <i>S. rubra</i> | CS              | <i>Streptomyces</i> sp. | MF773761            |
| USC16006   | denovo0  | <i>S. rubra</i> | CS              | <i>Streptomyces</i> sp. | MF773762            |
| USC16007   | denovo28 | <i>S. rubra</i> | CS              | <i>Streptomyces</i> sp. | MF773763            |
| USC16008   | denovo68 | <i>S. rubra</i> | CS              | <i>Streptomyces</i> sp. | MF773764            |
| USC16009   | denovo57 | <i>S. rubra</i> | CS              | <i>Streptomyces</i> sp. | MF773765            |
| USC16010   | denovo38 | <i>S. rubra</i> | CS              | <i>Streptomyces</i> sp. | MF773766            |
| USC16011   | denovo10 | <i>S. rubra</i> | CS              | <i>Streptomyces</i> sp. | MF773767            |
| USC16012   | denovo11 | <i>S. rubra</i> | CS              | <i>Streptomyces</i> sp. | MF773768            |
| USC16013   | denovo24 | <i>S. rubra</i> | CS              | <i>Streptomyces</i> sp. | MF773769            |
| USC16014   | denovo34 | <i>S. rubra</i> | CS              | <i>Streptomyces</i> sp. | MF773770            |

|          |          |                      |     |                           |          |
|----------|----------|----------------------|-----|---------------------------|----------|
| USC16015 | denovo4  | <i>S. rubra</i>      | CS  | <i>Streptomyces</i> sp.   | MF773771 |
| USC16016 | denovo25 | <i>S. rubra</i>      | CS  | <i>Streptomyces</i> sp.   | MF773772 |
| USC16017 | denovo29 | <i>S. rubra</i>      | CS  | <i>Streptomyces</i> sp.   | MF773773 |
| USC16018 | denovo19 | <i>S. rubra</i>      | CS  | <i>Streptomyces</i> sp.   | MF773774 |
| USC16019 | denovo48 | <i>S. rubra</i>      | CS  | <i>Streptomyces</i> sp.   | MF773775 |
| USC16020 | denovo48 | <i>S. rubra</i>      | CS  | <i>Streptomyces</i> sp.   | MF773776 |
| USC16021 | denovo30 | <i>S. rubra</i>      | SCA | <i>Streptomyces</i> sp.   | MF773777 |
| USC16022 | denovo29 | <i>A. solidium</i>   | CS  | <i>Streptomyces</i> sp.   | MF773778 |
| USC16023 | denovo73 | <i>A. solidium</i>   | CS  | <i>Streptomyces</i> sp.   | MF773779 |
| USC16024 | denovo27 | <i>P. vasculosum</i> | SCA | <i>Streptomyces</i> sp.   | MF773780 |
| USC16025 | denovo18 | <i>P. vasculosum</i> | SCA | <i>Streptomyces</i> sp.   | MF773781 |
| USC16026 | denovo63 | <i>P. vasculosum</i> | CS  | <i>Streptomyces</i> sp.   | MF773782 |
| USC16027 | denovo74 | <i>S. rubra</i>      | CS  | <i>Streptomyces</i> sp.   | MF773783 |
| USC16028 | denovo67 | <i>S. rubra</i>      | SA  | <i>Micromonospora</i> sp. | MF773784 |
| USC16029 | denovo67 | <i>S. rubra</i>      | SCA | <i>Micromonospora</i> sp. | MF773785 |
| USC16030 | denovo5  | <i>S. rubra</i>      | SA  | <i>Micromonospora</i> sp. | MF773786 |
| USC16031 | denovo46 | <i>S. rubra</i>      | SCA | <i>Micromonospora</i> sp. | MF773787 |
| USC16032 | denovo67 | <i>S. rubra</i>      | SCA | <i>Micromonospora</i> sp. | MF773788 |
| USC16033 | denovo70 | <i>S. rubra</i>      | SCA | <i>Micromonospora</i> sp. | MF773789 |
| USC16034 | denovo67 | <i>S. rubra</i>      | SCA | <i>Micromonospora</i> sp. | MF773790 |
| USC16035 | denovo23 | <i>S. rubra</i>      | SCA | <i>Micromonospora</i> sp. | MF773791 |
| USC16036 | denovo52 | <i>S. rubra</i>      | SCA | <i>Micromonospora</i> sp. | MF773792 |
| USC16037 | denovo1  | <i>S. rubra</i>      | SCA | <i>Micromonospora</i> sp. | MF773793 |
| USC16038 | denovo71 | <i>S. rubra</i>      | SCA | <i>Micromonospora</i> sp. | MF773794 |
| USC16039 | denovo16 | <i>S. rubra</i>      | SCA | <i>Micromonospora</i> sp. | MF773795 |
| USC16040 | denovo52 | <i>S. rubra</i>      | SCA | <i>Micromonospora</i> sp. | MF773796 |
| USC16041 | denovo12 | <i>S. rubra</i>      | CS  | <i>Streptomyces</i> sp.   | MF773797 |

Table S1 – Ascidian-associated actinomycete collection (continued)

| Isolate-ID | OTU | Ascidian host | Isolation media | 16S rRNA identification | GenBank accession # |
|------------|-----|---------------|-----------------|-------------------------|---------------------|
|------------|-----|---------------|-----------------|-------------------------|---------------------|

|          |          |                      |     |                           |          |
|----------|----------|----------------------|-----|---------------------------|----------|
| USC16042 | denovo51 | <i>S. rubra</i>      | SA  | <i>Micromonospora</i> sp. | MF773798 |
| USC16043 | denovo61 | <i>S. rubra</i>      | SA  | <i>Micromonospora</i> sp. | MF773799 |
| USC16044 | denovo56 | <i>S. rubra</i>      | SA  | <i>Micromonospora</i> sp. | MF773800 |
| USC16045 | denovo70 | <i>S. rubra</i>      | SA  | <i>Micromonospora</i> sp. | MF773801 |
| USC16046 | denovo33 | <i>S. rubra</i>      | SA  | <i>Micromonospora</i> sp. | MF773802 |
| USC16047 | denovo37 | <i>S. rubra</i>      | SA  | <i>Micromonospora</i> sp. | MF773803 |
| USC16048 | denovo23 | <i>S. rubra</i>      | SA  | <i>Micromonospora</i> sp. | MF773804 |
| USC16049 | denovo51 | <i>S. rubra</i>      | SCA | <i>Micromonospora</i> sp. | MF773805 |
| USC16050 | denovo52 | <i>S. rubra</i>      | SCA | <i>Micromonospora</i> sp. | MF773806 |
| USC16051 | denovo37 | <i>S. rubra</i>      | SA  | <i>Micromonospora</i> sp. | MF773807 |
| USC16052 | denovo70 | <i>S. rubra</i>      | SA  | <i>Micromonospora</i> sp. | MF773808 |
| USC16053 | denovo50 | <i>S. rubra</i>      | SA  | <i>Micromonospora</i> sp. | MF773809 |
| USC16054 | denovo67 | <i>S. rubra</i>      | SCA | <i>Micromonospora</i> sp. | MF773810 |
| USC16055 | denovo61 | <i>S. rubra</i>      | SCA | <i>Micromonospora</i> sp. | MF773811 |
| USC16056 | denovo8  | <i>S. rubra</i>      | SCA | <i>Micromonospora</i> sp. | MF773812 |
| USC16057 | denovo26 | <i>S. rubra</i>      | SCA | <i>Micromonospora</i> sp. | MF773813 |
| USC16058 | denovo67 | <i>S. rubra</i>      | SCA | <i>Micromonospora</i> sp. | MF773814 |
| USC16059 | denovo52 | <i>S. rubra</i>      | SCA | <i>Micromonospora</i> sp. | MF773815 |
| USC16060 | denovo70 | <i>S. rubra</i>      | SCA | <i>Micromonospora</i> sp. | MF773816 |
| USC16061 | denovo13 | <i>S. rubra</i>      | SCA | <i>Micromonospora</i> sp. | MF773817 |
| USC16062 | denovo31 | <i>S. rubra</i>      | SCA | <i>Streptomyces</i> sp.   | MF773818 |
| USC16063 | denovo47 | <i>S. rubra</i>      | SCA | <i>Streptomyces</i> sp.   | MF773819 |
| USC16064 | denovo53 | <i>A. solidium</i>   | SCA | <i>Micromonospora</i> sp. | MF773820 |
| USC16065 | denovo67 | <i>A. solidium</i>   | SCA | <i>Micromonospora</i> sp. | MF773821 |
| USC16066 | denovo66 | <i>A. solidium</i>   | SCA | <i>Micromonospora</i> sp. | MF773822 |
| USC16067 | denovo72 | <i>A. solidium</i>   | SCA | <i>Micromonospora</i> sp. | MF773823 |
| USC16068 | denovo36 | <i>A. solidium</i>   | SCA | <i>Streptomyces</i> sp.   | MF773824 |
| USC16069 | denovo17 | <i>A. solidium</i>   | SCA | <i>Micromonospora</i> sp. | MF773825 |
| USC16070 | denovo67 | <i>A. solidium</i>   | SCA | <i>Micromonospora</i> sp. | MF773826 |
| USC16071 | denovo72 | <i>P. vasculosum</i> | SA  | <i>Micromonospora</i> sp. | MF773827 |
| USC16072 | denovo70 | <i>A. solidium</i>   | SCA | <i>Micromonospora</i> sp. | MF773828 |

---

|          |          |                      |     |                           |          |
|----------|----------|----------------------|-----|---------------------------|----------|
| USC16073 | denovo70 | <i>A. solidium</i>   | SCA | <i>Micromonospora</i> sp. | MF773829 |
| USC16074 | denovo70 | <i>A. solidium</i>   | SCA | <i>Micromonospora</i> sp. | MF773830 |
| USC16075 | denovo70 | <i>A. solidium</i>   | SCA | <i>Micromonospora</i> sp. | MF773831 |
| USC16076 | denovo41 | <i>P. vasculosum</i> | SCA | <i>Micromonospora</i> sp. | MF773832 |
| USC16077 | denovo39 | <i>P. vasculosum</i> | SCA | <i>Micromonospora</i> sp. | MF773833 |
| USC16078 | denovo55 | <i>P. vasculosum</i> | SCA | <i>Micromonospora</i> sp. | MF773834 |
| USC16079 | denovo58 | <i>P. vasculosum</i> | SCA | <i>Micromonospora</i> sp. | MF773835 |
| USC16080 | denovo22 | <i>P. vasculosum</i> | SCA | <i>Micromonospora</i> sp. | MF773836 |
| USC16081 | denovo67 | <i>P. vasculosum</i> | SA  | <i>Micromonospora</i> sp. | MF773837 |
| USC16082 | denovo3  | <i>P. vasculosum</i> | SA  | <i>Micromonospora</i> sp. | MF773838 |
| USC16083 | denovo67 | <i>P. vasculosum</i> | SCA | <i>Micromonospora</i> sp. | MF773839 |
| USC16084 | denovo9  | <i>P. vasculosum</i> | SCA | <i>Micromonospora</i> sp. | MF773840 |
| USC16085 | denovo2  | <i>P. vasculosum</i> | SA  | <i>Micromonospora</i> sp. | MF773841 |
| USC16086 | denovo51 | <i>P. vasculosum</i> | SCA | <i>Micromonospora</i> sp. | MF773842 |
| USC16087 | denovo9  | <i>P. vasculosum</i> | SCA | <i>Micromonospora</i> sp. | MF773843 |

12

Table S1 – Ascidian-associated actinomycete collection (*continued*)

| Isolate-ID | OTU      | Ascidian host        | Isolation media | 16S rRNA identification   | GenBank accession # |
|------------|----------|----------------------|-----------------|---------------------------|---------------------|
| USC16088   | denovo61 | <i>P. vasculosum</i> | SA              | <i>Micromonospora</i> sp. | MF773844            |
| USC16089   | denovo53 | <i>P. vasculosum</i> | SA              | <i>Micromonospora</i> sp. | MF773845            |
| USC16090   | denovo37 | <i>P. vasculosum</i> | SA              | <i>Micromonospora</i> sp. | MF773846            |
| USC16091   | denovo7  | <i>A. solidium</i>   | CS              | <i>Nocardia</i> sp.       | MF773847            |
| USC16092   | denovo20 | <i>S. rubra</i>      | CS              | <i>Rhodococcus</i> sp.    | MF773848            |
| USC16093   | denovo7  | <i>S. rubra</i>      | CS              | <i>Nocardia</i> sp.       | MF773849            |
| USC16094   | denovo14 | <i>S. rubra</i>      | CS              | <i>Rhodococcus</i> sp.    | MF773850            |
| USC16095   | denovo42 | <i>S. rubra</i>      | SCA             | <i>Nocardia</i> sp.       | MF773851            |
| USC16096   | denovo45 | <i>S. rubra</i>      | SCA             | <i>Nocardia</i> sp.       | MF773852            |
| USC16097   | denovo64 | <i>S. rubra</i>      | SCA             | <i>Nocardia</i> sp.       | MF773853            |
| USC16098   | denovo75 | <i>A. solidium</i>   | SCA             | <i>Streptomyces</i> sp.   | MF773854            |
| USC16099   | denovo76 | <i>A. solidium</i>   | SCA             | <i>Streptomyces</i> sp.   | MF773855            |

|          |          |                      |     |                              |          |
|----------|----------|----------------------|-----|------------------------------|----------|
| USC16100 | denovo6  | <i>S. rubra</i>      | CS  | <i>Streptomyces</i> sp.      | MF773856 |
| USC16101 | denovo21 | <i>S. rubra</i>      | SA  | <i>Streptomyces</i> sp.      | MF773857 |
| USC16102 | denovo52 | <i>S. rubra</i>      | SA  | <i>Micromonospora</i> sp.    | MF773858 |
| USC16103 | denovo35 | <i>S. rubra</i>      | SCA | <i>Micromonospora</i> sp.    | MF773859 |
| USC16104 | denovo70 | <i>S. rubra</i>      | SCA | <i>Micromonospora</i> sp.    | MF773860 |
| USC16105 | denovo40 | <i>S. rubra</i>      | SCA | <i>Micromonospora</i> sp.    | MF773861 |
| USC16106 | denovo61 | <i>A. solidium</i>   | SCA | <i>Micromonospora</i> sp.    | MF773862 |
| USC16107 | denovo54 | <i>P. vasculosum</i> | SCA | <i>Micromonospora</i> sp.    | MF773863 |
| USC16108 | denovo59 | <i>S. rubra</i>      | SCA | <i>Micromonospora</i> sp.    | MF773864 |
| USC16109 | denovo61 | <i>A. solidium</i>   | SCA | <i>Micromonospora</i> sp.    | MF773865 |
| USC16110 | denovo38 | <i>S. rubra</i>      | CS  | <i>Streptomyces</i> sp.      | MF773866 |
| USC16111 | denovo62 | <i>S. rubra</i>      | SCA | <i>Micromonospora</i> sp.    | MF773867 |
| USC16112 | denovo70 | <i>S. rubra</i>      | CS  | <i>Micromonospora</i> sp.    | MF773868 |
| USC16113 | denovo60 | <i>P. vasculosum</i> | MA  | <i>Streptomyces</i> sp.      | MF773869 |
| USC16114 | denovo67 | <i>S. rubra</i>      | MA  | <i>Micromonospora</i> sp.    | MF773870 |
| USC16115 | denovo44 | <i>S. rubra</i>      | MA  | <i>Streptomyces</i> sp.      | MF773871 |
| USC16117 | denovo4  | <i>S. rubra</i>      | MA  | <i>Streptomyces</i> sp.      | MF773872 |
| USC16118 | denovo4  | <i>S. rubra</i>      | MA  | <i>Streptomyces</i> sp.      | MF773873 |
| USC16119 | denovo77 | <i>S. rubra</i>      | MA  | <i>Streptosporangium</i> sp. | MF773874 |
| USC16120 | denovo7  | <i>A. solidium</i>   | NH  | <i>Nocardia</i> sp.          | MF773875 |

---

Table S2. Molecular ion table – GNPS library hits

| Parent Mass | RT (min) | RT Stderror | LibraryID                                                          | <i>S. rubra</i> | <i>A. solidum</i> | <i>P. vasculosum</i> | <i>Symplegma _associate</i> | <i>Aplidium _associate</i> | <i>Polyclinum _associate</i> | <i>Streptomyces</i> | <i>Micromonospora</i> | <i>Streptosporangium</i> | <i>Nocardia</i> | <i>Rhodococcus</i> |
|-------------|----------|-------------|--------------------------------------------------------------------|-----------------|-------------------|----------------------|-----------------------------|----------------------------|------------------------------|---------------------|-----------------------|--------------------------|-----------------|--------------------|
| 495.899     | 11.83    | 0.54        | 1-Palmitoyl-sn-glycero-3-phosphocholine                            | 12              | 19                | 11                   | 0                           | 0                          | 3                            | 0                   | 3                     | 0                        | 0               | 0                  |
| 479.9       | 11.48    | 0.60        | 4-[5-[[4-[5-[acetyl(hydroxy)amino]pentylamino]-4-oxobutanoyl]-l    | 25              | 5                 | 15                   | 9                           | 2                          | 4                            | 0                   | 14                    | 0                        | 1               | 0                  |
| 481.929     | 14.96    | 4.70        | LysoPAF                                                            | 10              | 5                 | 1                    | 0                           | 0                          | 0                            | 0                   | 0                     | 0                        | 0               | 0                  |
| 411.325     | 15.58    | 0.33        | NCGC00180497-02!                                                   | 4               | 4                 | 0                    | 0                           | 0                          | 5                            | 0                   | 5                     | 0                        | 0               | 0                  |
| 474.831     | 12.60    | 3.21        | SildenafilCitrate                                                  | 0               | 2                 | 0                    | 1                           | 0                          | 2                            | 0                   | 3                     | 0                        | 0               | 0                  |
| 127.055     | 1.92     | 0.01        | Thymine                                                            | 0               | 2                 | 0                    | 0                           | 0                          | 0                            | 0                   | 0                     | 0                        | 0               | 0                  |
| 137.054     | 1.41     | 0.02        | Hypoxanthine                                                       | 0               | 1                 | 0                    | 3                           | 1                          | 2                            | 0                   | 4                     | 2                        | 0               | 0                  |
| 105.076     | 7.46     | 2.50        | Benzaldehyde                                                       | 0               | 1                 | 0                    | 1                           | 1                          | 1                            | 1                   | 2                     | 0                        | 0               | 0                  |
| 482.369     | 11.12    | 4.59        | LysoPAF                                                            | 1               | 1                 | 0                    | 0                           | 0                          | 0                            | 0                   | 0                     | 0                        | 0               | 0                  |
| 261.14      | 2.44     | 0.35        | gamma-L-Glutamyl-L-leucine                                         | 0               | 0                 | 0                    | 179                         | 43                         | 89                           | 39                  | 208                   | 4                        | 32              | 3                  |
| 261.029     | 3.54     | 0.10        | cyclo(Phe-4-Hyp)                                                   | 0               | 0                 | 0                    | 127                         | 20                         | 57                           | 88                  | 94                    | 1                        | 7               | 2                  |
| 211.077     | 3.32     | 1.02        | Cyclo(Pro-Leu)                                                     | 0               | 0                 | 0                    | 93                          | 20                         | 24                           | 47                  | 72                    | 1                        | 6               | 0                  |
| 247.063     | 1.84     | 0.10        | gamma-L-Glutamyl-L-valine                                          | 0               | 0                 | 0                    | 64                          | 16                         | 33                           | 22                  | 60                    | 3                        | 14              | 2                  |
| 227.075     | 3.10     | 0.11        | cyclo(L-Leu-L-4-Hyp)                                               | 0               | 0                 | 0                    | 63                          | 18                         | 35                           | 50                  | 52                    | 0                        | 5               | 0                  |
| 254.174     | 1.73     | 0.02        | Pheniramine formamide                                              | 0               | 0                 | 0                    | 55                          | 11                         | 13                           | 39                  | 35                    | 1                        | 1               | 0                  |
| 426.648     | 3.96     | 0.35        | Leupeptin                                                          | 0               | 0                 | 0                    | 29                          | 0                          | 0                            | 29                  | 0                     | 0                        | 0               | 0                  |
| 1128.73     | 17.45    | 2.26        | 6,18,30-trimethyl-3,9,12,15,21,24,27,33,36-nona(propan-2-yl)-1,7,1 | 0               | 0                 | 0                    | 28                          | 0                          | 0                            | 28                  | 0                     | 0                        | 0               | 0                  |
| 245.026     | 4.53     | 0.03        | cyclo(L-Phe-D-Pro)                                                 | 0               | 0                 | 0                    | 23                          | 1                          | 8                            | 8                   | 20                    | 0                        | 0               | 0                  |
| 309.798     | 1.97     | 0.10        | Bestatin                                                           | 0               | 0                 | 0                    | 20                          | 6                          | 6                            | 15                  | 11                    | 0                        | 4               | 0                  |
| 426.277     | 9.15     | 0.13        | 1-tetradecanoyl-sn-glycero-3-phosphoethanolamine                   | 0               | 0                 | 0                    | 18                          | 1                          | 7                            | 20                  | 6                     | 0                        | 0               | 0                  |
| 585.34      | 2.29     | 0.03        | Desferrioxamine B + Al                                             | 0               | 0                 | 0                    | 18                          | 4                          | 3                            | 0                   | 23                    | 2                        | 0               | 0                  |
| 912.889     | 7.61     | 0.08        | Surugamide_A                                                       | 0               | 0                 | 0                    | 15                          | 0                          | 3                            | 18                  | 0                     | 0                        | 0               | 0                  |
| 182.091     | 1.52     | 0.03        | Tyrosine                                                           | 0               | 0                 | 0                    | 15                          | 0                          | 1                            | 9                   | 6                     | 0                        | 1               | 0                  |
| 188.08      | 2.76     | 0.06        | Metrazoline                                                        | 0               | 0                 | 0                    | 14                          | 0                          | 3                            | 8                   | 6                     | 0                        | 3               | 0                  |
| 227.15      | 3.14     | 0.12        | cyclo(L-Leu-L-4-Hyp)                                               | 0               | 0                 | 0                    | 13                          | 2                          | 6                            | 8                   | 11                    | 1                        | 0               | 0                  |
| 132.11      | 1.45     | 0.62        | Leucine                                                            | 0               | 0                 | 1                    | 13                          | 3                          | 4                            | 11                  | 6                     | 0                        | 1               | 1                  |
| 197.138     | 3.10     | 0.01        | cyclo(L-Val-L-Pro)                                                 | 0               | 0                 | 0                    | 13                          | 0                          | 1                            | 4                   | 9                     | 0                        | 1               | 0                  |
| 260.828     | 2.46     | 0.25        | gamma-L-Glutamyl-L-leucine                                         | 0               | 0                 | 0                    | 12                          | 6                          | 7                            | 1                   | 16                    | 0                        | 4               | 0                  |
| 293.046     | 1.13     | 0.02        | Vanillylnonanamide                                                 | 0               | 0                 | 0                    | 10                          | 0                          | 1                            | 9                   | 1                     | 0                        | 1               | 0                  |
| 220.13      | 2.16     | 0.06        | Vitamin B5                                                         | 0               | 0                 | 0                    | 10                          | 0                          | 0                            | 10                  | 0                     | 0                        | 0               | 0                  |
| 143.091     | 1.04     | 0.01        | Ectoine                                                            | 0               | 0                 | 0                    | 8                           | 2                          | 1                            | 5                   | 1                     | 0                        | 4               | 0                  |
| 169.084     | 3.59     | 0.03        | Norharmane                                                         | 0               | 0                 | 0                    | 6                           | 1                          | 2                            | 3                   | 4                     | 0                        | 0               | 0                  |
| 403.758     | 14.39    | 0.44        | 2-(14-methylpentadecanoylamino)-3-phenylpropanoic acid             | 0               | 0                 | 0                    | 6                           | 0                          | 1                            | 7                   | 0                     | 0                        | 0               | 0                  |
| 621.434     | 12.89    | 0.02        | Rakicidin B                                                        | 0               | 0                 | 0                    | 6                           | 1                          | 0                            | 0                   | 5                     | 2                        | 0               | 0                  |
| 487.18      | 7.02     | 0.01        | (3R)-4-[6-[(2R,4R,5S,6R)-4,5-dihydroxy-6-methyloxan-2-yl]-1,5-di   | 0               | 0                 | 0                    | 6                           | 0                          | 0                            | 6                   | 0                     | 0                        | 0               | 0                  |
| 118.094     | 1.32     | 0.25        | Betaine                                                            | 0               | 0                 | 0                    | 6                           | 0                          | 0                            | 4                   | 1                     | 0                        | 1               | 0                  |
| 310.865     | 2.23     | 0.01        | gamma-Glutamyltyrosine                                             | 0               | 0                 | 0                    | 6                           | 0                          | 0                            | 0                   | 6                     | 0                        | 0               | 0                  |
| 124.047     | 1.38     | 0.01        | Vitamin B3                                                         | 0               | 0                 | 0                    | 5                           | 0                          | 3                            | 2                   | 5                     | 0                        | 0               | 0                  |
| 150.068     | 1.63     | 0.31        | Methionine                                                         | 0               | 0                 | 0                    | 5                           | 2                          | 0                            | 0                   | 0                     | 0                        | 5               | 0                  |
| 260.887     | 3.57     | 0.13        | cyclo(Phe-4-Hyp)                                                   | 0               | 0                 | 0                    | 5                           | 0                          | 0                            | 2                   | 3                     | 0                        | 0               | 0                  |
| 181.607     | 1.52     | 0.03        | L-Tyrosine                                                         | 1               | 0                 | 1                    | 4                           | 0                          | 1                            | 2                   | 3                     | 0                        | 0               | 0                  |
| 166.014     | 1.93     | 0.14        | Phenylalanine                                                      | 0               | 0                 | 0                    | 4                           | 0                          | 6                            | 5                   | 5                     | 0                        | 0               | 0                  |
| 426.074     | 9.25     | 0.09        | 1-tetradecanoyl-sn-glycero-3-phosphoethanolamine                   | 0               | 0                 | 0                    | 4                           | 0                          | 2                            | 4                   | 2                     | 0                        | 0               | 0                  |
| 597.22      | 10.24    | 0.01        | (3R)-4-[6-[(2S,4aS,5aR,9R,9aR,10aR)-2,9-dimethyl-3-oxo-4,4a,5a,6   | 0               | 0                 | 0                    | 4                           | 0                          | 0                            | 4                   | 0                     | 0                        | 0               | 0                  |
| 298.112     | 2.53     | 0.02        | 5'-Methylthioadenosine                                             | 0               | 0                 | 0                    | 4                           | 0                          | 0                            | 2                   | 2                     | 0                        | 0               | 0                  |

15

Table S2. Molecular ion table – GNPS library hits (continued)

| parent mass | RT (min) | RT Stderror | LibraryID                                                   | <i>S. rubra</i> | <i>A. solidum</i> | <i>P. vasculosum</i> | <i>Symplegma</i> _associate | <i>Aplidium</i> _associate | <i>Polyclinum</i> _associate | <i>Streptomyces</i> | <i>Micromonospora</i> | <i>Streptosporangium</i> | <i>Nocardia</i> | <i>Rhodococcus</i> |
|-------------|----------|-------------|-------------------------------------------------------------|-----------------|-------------------|----------------------|-----------------------------|----------------------------|------------------------------|---------------------|-----------------------|--------------------------|-----------------|--------------------|
| 429.333     | 3.94     | 0.09        | Leupeptin hemisulfate salt                                  | 0               | 0                 | 0                    | 4                           | 0                          | 0                            | 4                   | 0                     | 0                        | 0               | 0                  |
| 261.136     | 3.50     | 0.03        | cyclo(Phe-4-Hyp)                                            | 0               | 0                 | 0                    | 3                           | 0                          | 1                            | 2                   | 2                     | 0                        | 0               | 0                  |
| 146.101     | 1.06     | 0.01        | Glutamic acid                                               | 0               | 0                 | 0                    | 3                           | 3                          | 0                            | 0                   | 6                     | 0                        | 0               | 0                  |
| 296.325     | 4.68     | 0.05        | methyl 2-[(3-fomamido-2-hydroxybenzoyl)amino]-3-hydroxybuta | 0               | 0                 | 0                    | 3                           | 0                          | 0                            | 3                   | 0                     | 0                        | 0               | 0                  |
| 296.29      | 4.65     | 0.03        | methyl 2-[(3-fomamido-2-hydroxybenzoyl)amino]-3-hydroxybuta | 0               | 0                 | 0                    | 3                           | 0                          | 0                            | 3                   | 0                     | 0                        | 0               | 0                  |
| 267.614     | 1.72     | 0.20        | Adenosine                                                   | 2               | 0                 | 0                    | 2                           | 0                          | 0                            | 1                   | 1                     | 0                        | 0               | 0                  |
| 426.387     | 15.20    | 0.18        | Ethmozine                                                   | 0               | 0                 | 0                    | 2                           | 1                          | 2                            | 3                   | 1                     | 0                        | 0               | 0                  |
| 153.786     | 16.47    | 1.50        | Acetamide                                                   | 0               | 0                 | 0                    | 2                           | 0                          | 2                            | 2                   | 2                     | 0                        | 0               | 0                  |
| 132.11      | 1.21     | 0.18        | L-Leucine                                                   | 0               | 0                 | 0                    | 2                           | 2                          | 1                            | 3                   | 2                     | 0                        | 0               | 0                  |
| 267.261     | 1.61     | 0.04        | Adenosine                                                   | 0               | 0                 | 0                    | 2                           | 1                          | 1                            | 1                   | 1                     | 1                        | 0               | 0                  |
| 227.147     | 3.15     | 0.10        | cyclo-[L-(4-hydroxy-Pro)-L-leu]                             | 0               | 0                 | 0                    | 2                           | 0                          | 1                            | 1                   | 2                     | 0                        | 0               | 0                  |
| 526.969     | 1.10     | 0.09        | Polysaccharide Hexose x3                                    | 0               | 0                 | 0                    | 2                           | 0                          | 1                            | 2                   | 1                     | 0                        | 0               | 0                  |
| 364.857     | 1.06     | 0.09        | sucrose                                                     | 0               | 0                 | 0                    | 2                           | 0                          | 1                            | 1                   | 2                     | 0                        | 0               | 0                  |
| 178.095     | 2.19     | 0.01        | 3-Amino-3-(4-hydroxyphenyl)propionate                       | 0               | 0                 | 0                    | 2                           | 0                          | 0                            | 2                   | 0                     | 0                        | 0               | 0                  |
| 257.222     | 6.42     | 0.01        | 5-beta-Androstane-3-alpha                                   | 0               | 0                 | 0                    | 2                           | 0                          | 0                            | 2                   | 0                     | 0                        | 0               | 0                  |
| 211.118     | 2.03     | 0.02        | cyclo(L-Leu-L-Pro)                                          | 0               | 0                 | 0                    | 2                           | 0                          | 0                            | 1                   | 1                     | 0                        | 0               | 0                  |
| 205.119     | 1.94     | 1.22        | Tryptophan                                                  | 0               | 0                 | 0                    | 2                           | 0                          | 0                            | 1                   | 0                     | 0                        | 1               | 0                  |
| 205.107     | 2.75     | 0.08        | Tryptophan                                                  | 0               | 0                 | 0                    | 2                           | 0                          | 0                            | 2                   | 0                     | 0                        | 0               | 0                  |
| 152.066     | 1.39     | 0.28        | Xanthine                                                    | 3               | 0                 | 0                    | 1                           | 0                          | 0                            | 0                   | 1                     | 0                        | 0               | 0                  |
| 144.089     | 3.23     | 0.22        | Quinolin-4-ol                                               | 0               | 0                 | 0                    | 1                           | 2                          | 2                            | 1                   | 4                     | 0                        | 0               | 0                  |
| 227.149     | 3.25     | 0.02        | cyclo(L-Leu-L-4-hydroxy-Pro)                                | 0               | 0                 | 0                    | 1                           | 0                          | 1                            | 1                   | 1                     | 0                        | 0               | 0                  |
| 247.141     | 1.88     | 0.07        | gamma-L-Glutamyl-L-valine                                   | 0               | 0                 | 0                    | 1                           | 0                          | 0                            | 0                   | 1                     | 0                        | 0               | 0                  |
| 194.572     | 2.15     | 0.53        | Caffeine                                                    | 12              | 0                 | 0                    | 0                           | 0                          | 0                            | 0                   | 0                     | 0                        | 0               | 0                  |
| 429.023     | 4.81     | 0.03        | 8-desoxyenterocin                                           | 0               | 0                 | 0                    | 0                           | 0                          | 12                           | 12                  | 0                     | 0                        | 0               | 0                  |
| 521.431     | 11.18    | 0.55        | 1-Oleoyl-sn-glycero-3-phosphocholine                        | 0               | 0                 | 2                    | 0                           | 0                          | 4                            | 0                   | 4                     | 0                        | 0               | 0                  |
| 245.139     | 4.55     | 0.02        | cyclo(L-Phe-D-Pro)                                          | 0               | 0                 | 0                    | 0                           | 1                          | 1                            | 1                   | 1                     | 0                        | 0               | 0                  |
| 592.93      | 14.85    | 0.02        | Pheophorbide A                                              | 0               | 0                 | 3                    | 0                           | 0                          | 0                            | 0                   | 0                     | 0                        | 0               | 0                  |
| 154.165     | 16.51    | 2.59        | Xanthine                                                    | 0               | 0                 | 1                    | 0                           | 1                          | 0                            | 1                   | 0                     | 0                        | 0               | 0                  |
| 154.167     | 18.16    | 0.04        | L-Histidine                                                 | 0               | 0                 | 0                    | 0                           | 1                          | 0                            | 1                   | 0                     | 0                        | 0               | 0                  |

16

17
